# Supplementary material
Source: PubMed Central journal article supplement (PMC8065080)
Supplement: 13613_2021_850_MOESM1_ESM.pdf [file 13613_2021_850_MOESM1_ESM.pdf]

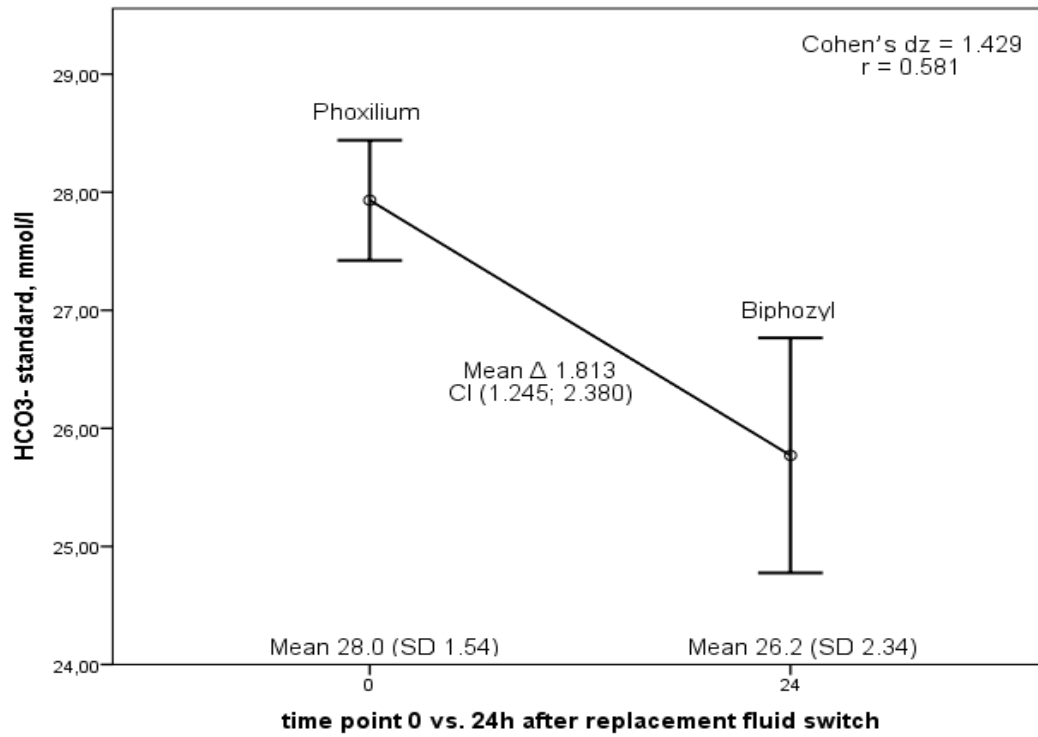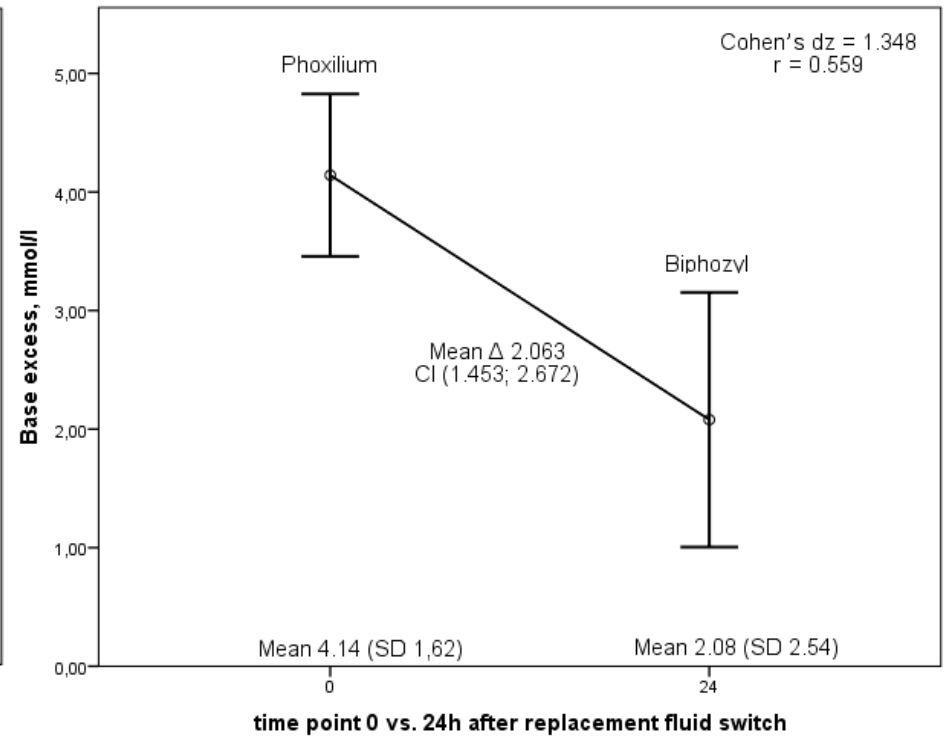

Figure S1. Change of HCO<sub>3</sub><sup>-</sup> and BE between the switch of the replacement fluid and 24h thereafter. Mean Difference ( $\Delta$ ), Confidence Interval (CI) 95%, effect size measure measured with Cohen's  $d_z$  and Pearson correlation coefficient.
