# Supplementary material
Source: PubMed Central journal article supplement (PMC8065080)
Supplement: 13613_2021_850_MOESM2_ESM.pdf [file 13613_2021_850_MOESM2_ESM.pdf]

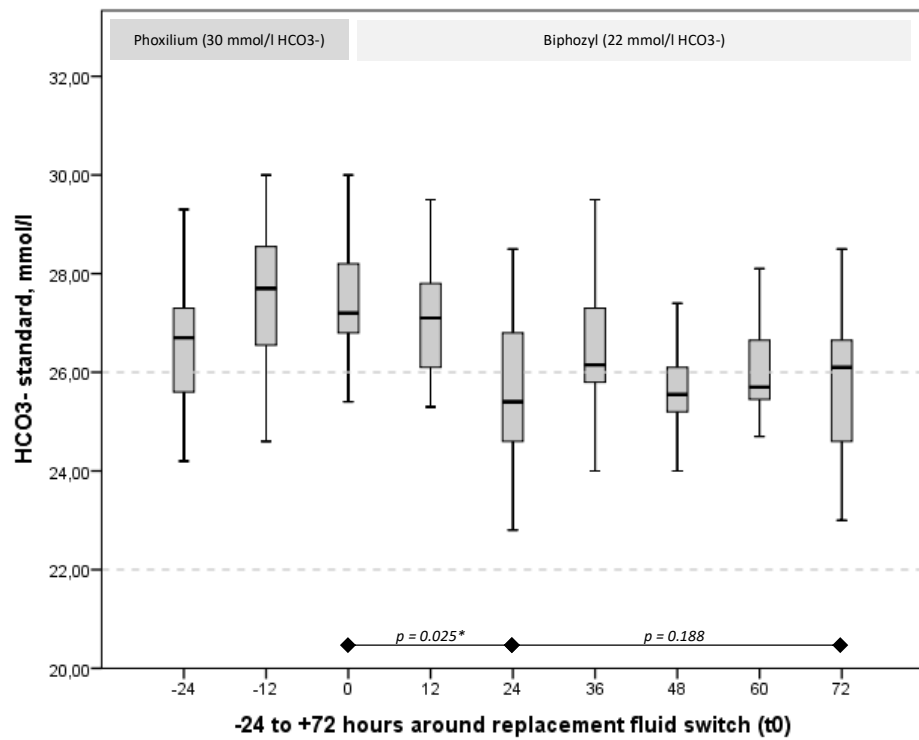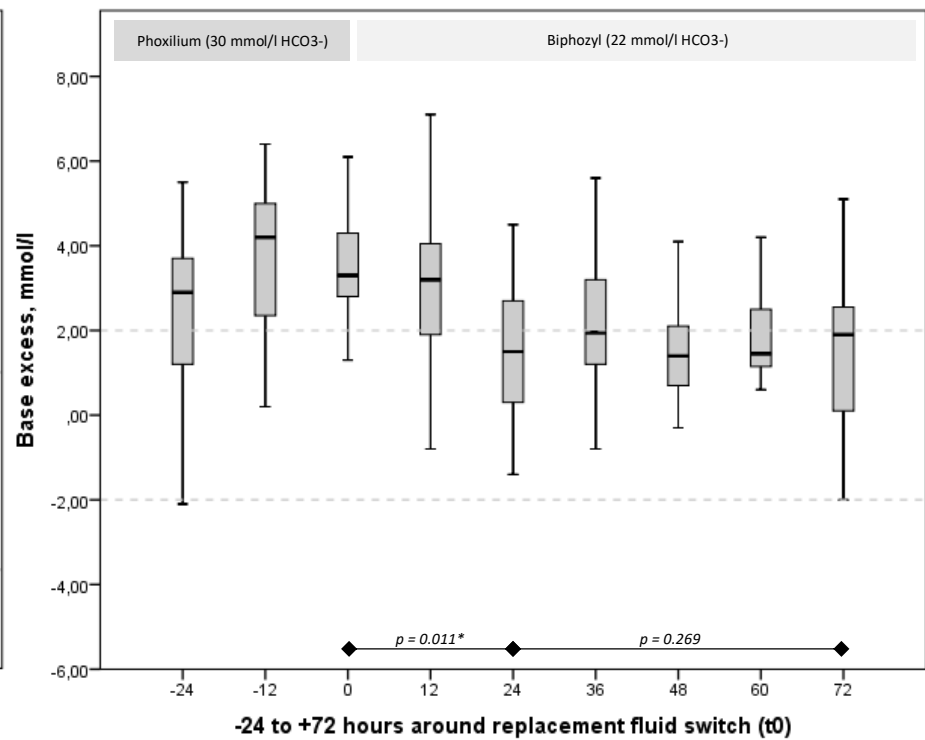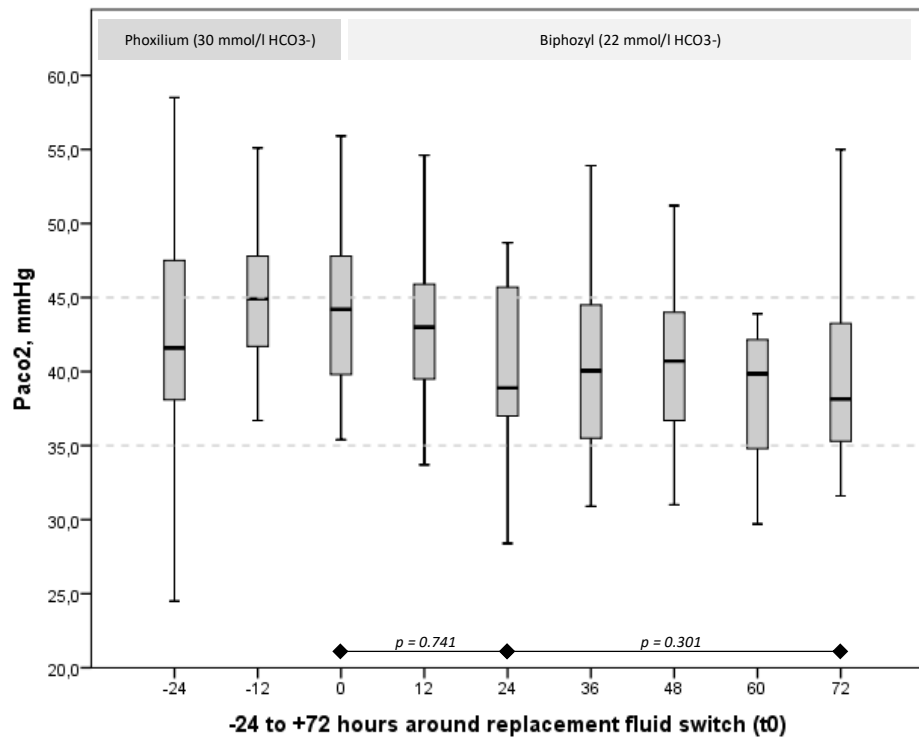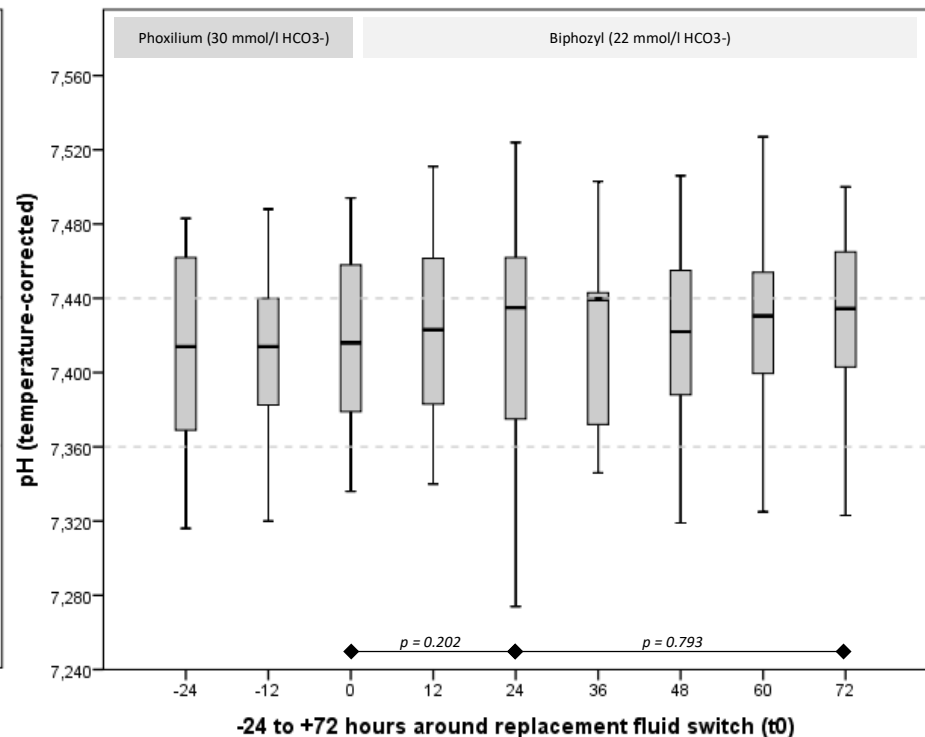

Figure S2. Sensitivity analysis comprising 26 patients with a complete dataset from -24h to +72h.
